# Supplementary material for: Serological Screening of Influenza A Virus Antibodies in Cats and Dogs Indicates Frequent Infection with Different Subtypes
Source: PubMed Central journal article supplement (PMC7587082; doi:10.1128/jcm.01689-20), 2020-10-21
Supplement: JCM.01689-20-s0001.pdf [file JCM.01689-20-s0001.pdf]

## Supplementary materials

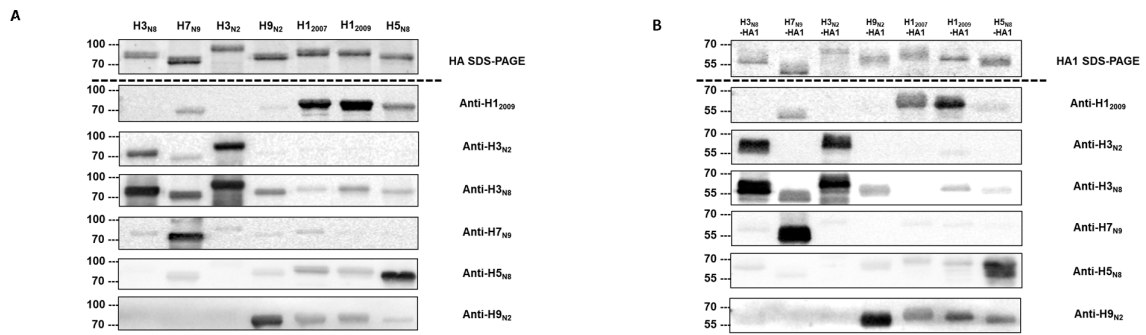

Figure S1. Reactivities of reference antisera against different HA (A) and HA1 (B) proteins analyzed by western blot analysis.

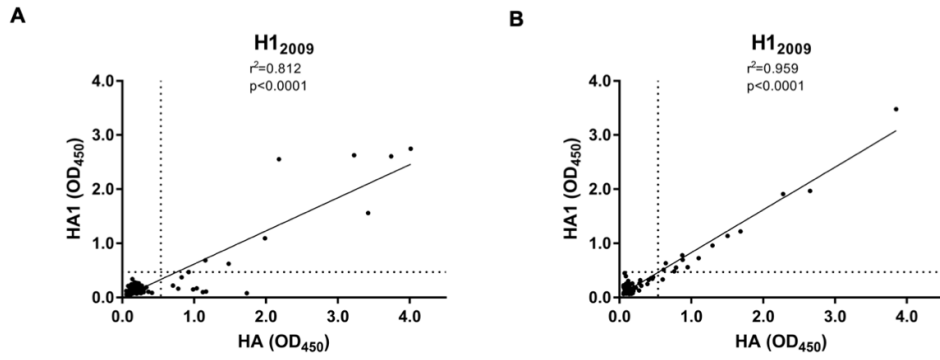

Figure S2. Correlation between the OD values obtained with HA and HA1 ELISA of H1<sub>2009</sub>. (A) Cat serum samples from 2016 cohort; (B) dog serum samples from 2019 cohort. Correlation and regression coefficients were shown above the figures.

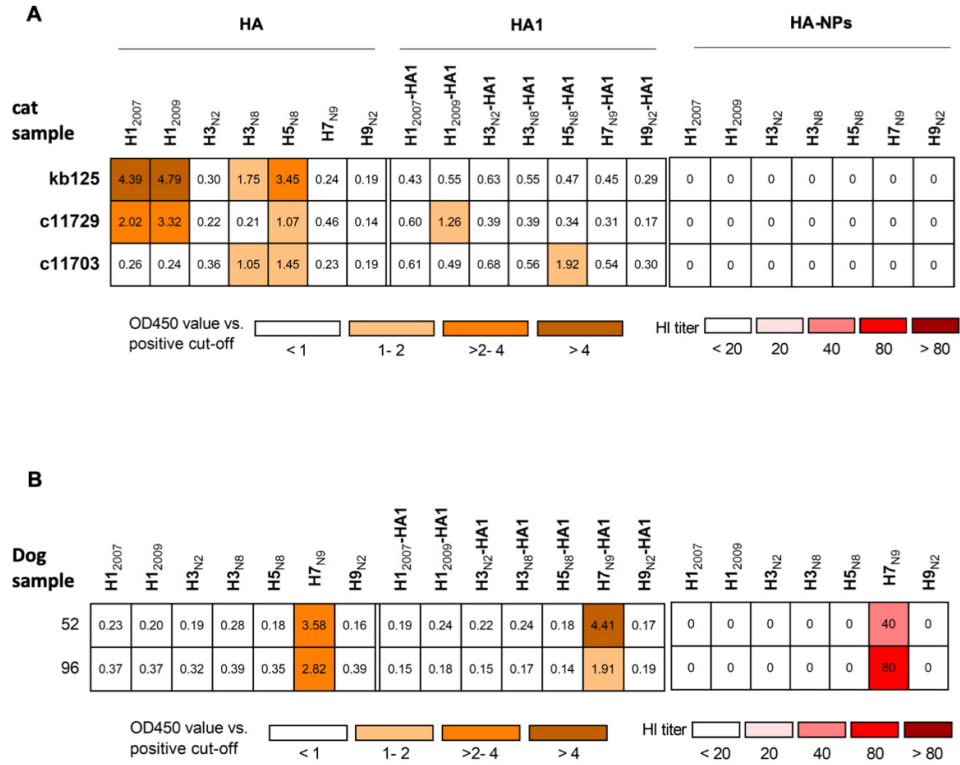

Figure S3. Reactivity of cat (A) and dog (B) serum samples collected before 2009 against different HAs as measured by HA ELISA, HA1 ELISA and nanoparticle-based HI. ELISA results are expressed as ratios of OD450 value divided by the positive cut-off (OD450 value vs positive cut-off).

Table S1. Half maximal effective concentration (EC<sub>50</sub>) determined of each reference serum against corresponding HA and HA1 proteins. Results are expressed as dilution ratios.

|     | anti-H1 <sub>2009</sub> | anti-H3 <sub>N2</sub> | anti-H3 <sub>N8</sub> | anti-H5 <sub>N8</sub> | anti-H7 <sub>N9</sub> | anti-H9 <sub>N2</sub> |
|-----|-------------------------|-----------------------|-----------------------|-----------------------|-----------------------|-----------------------|
| HA  | 1:1416                  | 1:232                 | 1:2847                | 1:2710                | 1:14371               | 1:182                 |
| HA1 | 1:838                   | 1:41                  | 1:2547                | 1:2632                | 1:15404               | 1:70                  |



Table S3. Comparison of hemagglutination inhibition (HI) titers of cat serum samples against H1<sub>2009</sub>-NPs and H1N1 virus particles. Negative sera (HI titer <20), are represented as 0 in the table.

| Characteristic                          | number                                   | H1 <sub>2009</sub> -NPs | H1N1 |
|-----------------------------------------|------------------------------------------|-------------------------|------|
| Shelter cat serum samples (2016 cohort) | UFB 33                                   | 80                      | 80   |
|                                         | UFB 93                                   | 80                      | 80   |
|                                         | UFB 22                                   | 20                      | 20   |
|                                         | UFB 74                                   | 40                      | 40   |
|                                         | UFB 277                                  | 40                      | 20   |
|                                         | UFB 279                                  | 20                      | 20   |
|                                         | UFB 31                                   | 40                      | 40   |
|                                         | UFB 11                                   | 0                       | 0    |
|                                         | UFB 17                                   | 0                       | 0    |
|                                         | UFB 18                                   | 0                       | 0    |
|                                         | UFB 14                                   | 0                       | 0    |
|                                         | UFB 23                                   | 0                       | 0    |
|                                         | FCoV specific sera derived from SPF cats | cat 14                  | 0    |
| cat 15                                  |                                          | 0                       | 0    |
| cat 91                                  |                                          | 0                       | 0    |
| cat 93                                  |                                          | 0                       | 0    |
| cat 95                                  |                                          | 0                       | 0    |
| cat 115                                 |                                          | 0                       | 0    |
| cat 131                                 |                                          | 0                       | 0    |

Abbreviations: H1N1, Influenza virus A/Netherlands/602/2009; H1<sub>2009</sub>-NPs, SpyCatcher-mi3: H1<sub>2009</sub>-SpyTag nanoparticles; FCoV, feline coronavirus; SPF, specific pathogen free

Table S4. Numbers of all HA positive (n=21) and 14 negative dog samples from 2019 cohort and different combinations of reactivity observed. Positive reactions are colored in orange.

| Row nr.  | HA-ELISA           |                    |                  |                  |                  |                  |                  | HA1-ELISA          |                    |                  |                  |                  |                  |                  | HA-NPs             |                    |                  |                  |                  |                  | ID Screen® | Number of dogs (Total=21) |                  |
|----------|--------------------|--------------------|------------------|------------------|------------------|------------------|------------------|--------------------|--------------------|------------------|------------------|------------------|------------------|------------------|--------------------|--------------------|------------------|------------------|------------------|------------------|------------|---------------------------|------------------|
|          | H1 <sub>2007</sub> | H1 <sub>2009</sub> | H3 <sub>N2</sub> | H3 <sub>N8</sub> | H5 <sub>N8</sub> | H7 <sub>N9</sub> | H9 <sub>N2</sub> | H1 <sub>2007</sub> | H1 <sub>2009</sub> | H3 <sub>N2</sub> | H3 <sub>N8</sub> | H5 <sub>N8</sub> | H7 <sub>N9</sub> | H9 <sub>N2</sub> | H1 <sub>2007</sub> | H1 <sub>2009</sub> | H3 <sub>N2</sub> | H3 <sub>N8</sub> | H5 <sub>N8</sub> | H7 <sub>N9</sub> |            |                           | H9 <sub>N2</sub> |
| <b>A</b> |                    |                    |                  |                  |                  |                  |                  |                    |                    |                  |                  |                  |                  |                  |                    |                    |                  |                  |                  |                  |            |                           | 1                |
| <b>B</b> |                    |                    |                  |                  |                  |                  |                  |                    |                    |                  |                  |                  |                  |                  |                    |                    |                  |                  |                  |                  |            |                           | 1                |
| <b>C</b> |                    |                    |                  |                  |                  |                  |                  |                    |                    |                  |                  |                  |                  |                  |                    |                    |                  |                  |                  |                  |            |                           | 2                |
| <b>D</b> |                    |                    |                  |                  |                  |                  |                  |                    |                    |                  |                  |                  |                  |                  |                    |                    |                  |                  |                  |                  |            |                           | 7                |
| <b>E</b> |                    |                    |                  |                  |                  |                  |                  |                    |                    |                  |                  |                  |                  |                  |                    |                    |                  |                  |                  |                  |            |                           | 2                |
| <b>F</b> |                    |                    |                  |                  |                  |                  |                  |                    |                    |                  |                  |                  |                  |                  |                    |                    |                  |                  |                  |                  |            |                           | 1                |
| <b>G</b> |                    |                    |                  |                  |                  |                  |                  |                    |                    |                  |                  |                  |                  |                  |                    |                    |                  |                  |                  |                  |            |                           | 2                |
| <b>H</b> |                    |                    |                  |                  |                  |                  |                  |                    |                    |                  |                  |                  |                  |                  |                    |                    |                  |                  |                  |                  |            |                           | 3                |
| <b>I</b> |                    |                    |                  |                  |                  |                  |                  |                    |                    |                  |                  |                  |                  |                  |                    |                    |                  |                  |                  |                  |            |                           | 1                |
| <b>J</b> |                    |                    |                  |                  |                  |                  |                  |                    |                    |                  |                  |                  |                  |                  |                    |                    |                  |                  |                  |                  |            |                           | 1                |
| <b>K</b> |                    |                    |                  |                  |                  |                  |                  |                    |                    |                  |                  |                  |                  |                  |                    |                    |                  |                  |                  |                  |            |                           | 14               |

Table S5. Summary of antibody responses against each HA by HA ELISA in pre-2009 or post-2009 cat cohorts.

| HA                       | Pre-2009      |                 |                         |                     | Post-2009     |                 |                         |                     | Pre-2009 vs. Post-2009      |
|--------------------------|---------------|-----------------|-------------------------|---------------------|---------------|-----------------|-------------------------|---------------------|-----------------------------|
|                          | Sample number | Positive number | Prevalence <sup>a</sup> | 95% CI <sup>b</sup> | Sample number | Positive number | Prevalence <sup>a</sup> | 95% CI <sup>b</sup> | <i>p</i> value <sup>c</sup> |
| H1 <sub>2007</sub>       | 68            | 2               | 0.029                   | 0.002-0.107         | 253           | 12              | 0.047                   | 0.027-0.082         | 0.5275                      |
| <b>H1<sub>2009</sub></b> | <b>68</b>     | <b>2</b>        | <b>0.029</b>            | <b>0.002-0.107</b>  | <b>253</b>    | <b>37</b>       | <b>0.146</b>            | <b>0.108-0.195</b>  | <b>0.0141</b>               |
| H3 <sub>N2</sub>         | 68            | 0               | 0                       | 0.000-0.064         | 253           | 5               | 0.020                   | 0.007-0.047         | 0.2464                      |
| H3 <sub>N8</sub>         | 68            | 2               | 0.029                   | 0.002-0.107         | 253           | 4               | 0.016                   | 0.005-0.041         | 0.4664                      |
| H5 <sub>N8</sub>         | 68            | 3               | 0.044                   | 0.010-0.127         | 253           | 11              | 0.043                   | 0.024-0.077         | 0.9823                      |
| H7 <sub>N9</sub>         | 68            | 0               | 0                       | 0.000-0.064         | 253           | 6               | 0.024                   | 0.010-0.052         | 0.2041                      |
| H9 <sub>N2</sub>         | 68            | 0               | 0                       | 0.000-0.064         | 253           | 6               | 0.024                   | 0.010-0.052         | 0.2041                      |

<sup>a</sup>prevalence =positive number/sample number

<sup>b</sup>95%CI: 95% confidence interval (computed by the modified Wald method)

<sup>c</sup>*p* value: represent the significance of the difference of the prevalence between two cohorts (Chi-square test)



Table S6. Summary of antibody responses against each HA by HA ELISA in pre-2009 or post-2009 dog cohorts.

| HA                       | Pre-2009      |                 |                         |                     | Post-2009     |                 |                         |                     | Pre-2009 vs. Post-2009      |
|--------------------------|---------------|-----------------|-------------------------|---------------------|---------------|-----------------|-------------------------|---------------------|-----------------------------|
|                          | Sample number | Positive number | Prevalence <sup>a</sup> | 95% CI <sup>b</sup> | Sample number | Positive number | Prevalence <sup>a</sup> | 95% CI <sup>b</sup> | <i>p</i> value <sup>c</sup> |
| H1 <sub>2007</sub>       | 68            | 0               | 0                       | 0.000-0.064         | 154           | 0               | 0                       | 0.000-0.029         | n/a                         |
| <b>H1<sub>2009</sub></b> | <b>68</b>     | <b>0</b>        | <b>0</b>                | <b>0.000-0.064</b>  | <b>154</b>    | <b>19</b>       | <b>0.123</b>            | <b>0.080-0.185</b>  | <b>0.0038</b>               |
| H3 <sub>N2</sub>         | 68            | 0               | 0                       | 0.000-0.064         | 154           | 0               | 0                       | 0.000-0.029         | n/a                         |
| H3 <sub>N8</sub>         | 68            | 0               | 0                       | 0.000-0.064         | 154           | 0               | 0                       | 0.000-0.029         | n/a                         |
| H5 <sub>N8</sub>         | 68            | 0               | 0                       | 0.000-0.064         | 154           | 2               | 0.013                   | 0.001-0.049         | 0.3471                      |
| H7 <sub>N9</sub>         | 68            | 2               | 0.029                   | 0.002-0.107         | 154           | 1               | 0.007                   | <0.0001-0.040       | 0.1758                      |
| H9 <sub>N2</sub>         | 68            | 0               | 0                       | 0.000-0.064         | 154           | 0               | 0                       | 0.000-0.029         | n/a                         |

<sup>a</sup>prevalence =positive number/sample number

<sup>b</sup>95%CI: 95% confidence interval (computed by the modified Wald method)

<sup>c</sup>*p* value: represent the significance of the difference of the prevalence between two cohorts (Chi-square test)
